# Supplementary material
Source: publisher figshare collection journal article supplement (https://acs.figshare.com/ndownloader/files/18133022)
Supplement: Supplementary file 1 [file 18133022]

# Organometallics

## Supporting Information

### **A Biomimetic Model for the Active Site of [Fe]-H<sub>2</sub>ase Featuring a 2-Methoxy-3,5-dimethyl-4-phosphato-6-acylmethylpyridine Ligand**

Li-Cheng Song,<sup>\*†‡</sup> Liang Zhu,<sup>†</sup> and Bei-Bei Liu<sup>†</sup>

<sup>†</sup>Department of Chemistry, State Key Laboratory of Elemento-Organic Chemistry, College of Chemistry, Nankai University, Tianjin 300071, China

<sup>‡</sup>Collaborative Innovation Center of Chemical Science and Engineering (Tianjin), Tianjin 300072, China

#### **Contents:**

##### **1. Experimental details**

- (1) General considerations
- (2) Synthesis and spectroscopic data of compounds 1–7

##### **2. X-ray crystal structure determinations of 4 and 7 (Table S1).**

##### **3. Comparison of some bond lengths (Å) and angles (deg) between model 7 and the active site of [Fe]-H<sub>2</sub>ase (Scheme S1)**

##### **4. IR and NMR spectra of 1–7 (Figures S1–S22)**

- (1) IR and <sup>1</sup>H (<sup>13</sup>C) NMR spectra of 1 (Figures S1–S3)
- (2) IR and <sup>1</sup>H (<sup>13</sup>C) NMR spectra of 2 (Figures S4–S6)
- (3) IR and <sup>1</sup>H (<sup>13</sup>C) NMR spectra of 3 (Figures S7–S9)
- (4) IR and <sup>1</sup>H (<sup>13</sup>C) NMR spectra of 4 (Figures S10–S12)
- (5) IR and <sup>1</sup>H (<sup>13</sup>C) NMR spectra of 5 (Figures S13–S15)
- (6) IR and <sup>1</sup>H (<sup>13</sup>C) NMR spectra of 6 (Figures S16–S18)

**(7) IR and  $^1\text{H}$  ( $^{13}\text{C}$ ,  $^{31}\text{P}$ ) NMR spectra of 7 (Figures S19–S22)**

## **5. References**

## 1. Experimental details

### (1) General considerations

All reactions were carried out using standard Schlenk and vacuum-line techniques under an atmosphere of highly purified nitrogen. MeCN, CH<sub>2</sub>Cl<sub>2</sub> and N, N-dimethylformamide (DMF) were distilled under N<sub>2</sub> from CaH<sub>2</sub>, while THF from sodium/benzophenone ketyl. *t*-Butyldimethylsilyl chloride (TBSCl), *n*-Bu<sub>4</sub>NF (1 M in THF), *n*-BuLi (1.6 M in hexane), MeI, Ag<sub>2</sub>CO<sub>3</sub>, I<sub>2</sub>, O=P(PhO)<sub>2</sub>Cl, and some other materials are available commercially and used without further purification. 4-hydroxy-3,5,6-trimethyl-2-pyridone (**A**),<sup>1</sup> 6-methyl-2-mercaptopyridine,<sup>2</sup> and Na<sub>2</sub>Fe(CO)<sub>4</sub>·(1,4-dioxane)<sub>1.5</sub><sup>3</sup> were prepared according to the published methods. Column chromatography was performed on silica gel (100–200 mesh) using a proper eluent. While the solid state IR spectra were recorded on a Bio-Rad FTS 135 infrared spectrophotometer, the <sup>1</sup>H, <sup>13</sup>C{<sup>1</sup>H}, and <sup>31</sup>P{<sup>1</sup>H} NMR spectra in solution were obtained on a Bruker Avance 400 NMR spectrometer. Elemental analyses were performed on an Elementar Vario EL analyzer. Melting points were determined on a SGW X-4 microscopic melting point apparatus and were uncorrected.

### (2) Synthesis and spectroscopic data of compounds 1–7

**Preparation of 4-TBSO-3,5,6-trimethyl-2-pyridone (1).** A solution consisting of 4-hydroxy-3,5,6-trimethyl-2-pyridone (**A**) (1.53 g, 10.0 mmol), TBSCl (1.51 g, 10.0 mmol), Et<sub>3</sub>N (1.70 mL, 12.0 mmol), and DMF (20 mL) was stirred at room temperature for 24 h and then a large excess of ice-water mixture (60 mL) was added. After the resulting mixture was extracted with ethyl acetate (10 mL×3), the combined

organic layers were washed with saturated aqueous NaCl (50 mL) and then was dried over anhydrous Na<sub>2</sub>SO<sub>4</sub>. After removal of Na<sub>2</sub>SO<sub>4</sub> and solvent ethyl acetate, **1** (2.30 g, 86%) was obtained as a white solid. Mp 102–103 °C (dec). Anal. Calcd for C<sub>14</sub>H<sub>25</sub>NO<sub>2</sub>Si: C, 62.87; H, 9.42; N, 5.24. Found: C, 62.65; H, 9.42; N, 5.17. IR (KBr disk):  $\nu_{\text{C=O}}$  1644 (vs);  $\nu_{\text{Si-CH}_3}$  831 (s) cm<sup>-1</sup>. <sup>1</sup>H NMR (400 MHz, CDCl<sub>3</sub>): 0.14 (s, 6H, (CH<sub>3</sub>)<sub>2</sub>Si), 0.98 (s, 9H, (CH<sub>3</sub>)<sub>3</sub>C), 1.87 (s, 3H, 5-CH<sub>3</sub> of C<sub>5</sub>N), 1.96 (s, 3H, 6-CH<sub>3</sub> of C<sub>5</sub>N), 2.26 (s, 3H, 3-CH<sub>3</sub> of C<sub>5</sub>N), 13.24 (s, 1H, NH) ppm. <sup>13</sup>C{<sup>1</sup>H} NMR (100 MHz, CDCl<sub>3</sub>): -3.1 (s, (CH<sub>3</sub>)<sub>2</sub>Si), 10.8 (s, 5-CH<sub>3</sub> of C<sub>5</sub>N), 11.8 (s, 6-CH<sub>3</sub> of C<sub>5</sub>N), 17.2 (s, 3-CH<sub>3</sub> of C<sub>5</sub>N), 18.7 (s, C(CH<sub>3</sub>)<sub>3</sub>), 26.0 (s, C(CH<sub>3</sub>)<sub>3</sub>), 108.8, 111.7, 139.5, 162.2, 166.0 (5s, C<sub>5</sub>N) ppm.

**Preparation of 2-Methoxy-4-TBSO-3,5,6-trimethylpyridine (2).** A heterogeneous solution consisting of pyridone derivative **1** (0.53 g, 2.0 mmol), Ag<sub>2</sub>CO<sub>3</sub> (0.83 g, 3.0 mmol) and MeI (1.25 mL, 20.0 mmol), and CH<sub>2</sub>Cl<sub>2</sub> (10 mL) was stirred at room temperature for 10 h in the dark. The resulting mixture was first filtered through celite and then washed the celite using CH<sub>2</sub>Cl<sub>2</sub> (5 mL×3) to give a filtrate. Solvent was removed from the filtrate at reduced pressure to leave a residue, which was subjected to column chromatography (silica gel). Elution with ethyl acetate/petroleum ether (v:v = 1:20) and then removal of ethyl acetate/petroleum ether from the eluate produced **2** (0.430 g, 76%) as a colorless oil; R<sub>f</sub> = 0.32 [TLC, SiO<sub>2</sub>, ethyl acetate/petroleum ether (v:v = 1:20)]. Anal. Calcd for C<sub>15</sub>H<sub>27</sub>NO<sub>2</sub>Si: C, 64.01; H, 9.67; N, 4.98. Found: C, 64.00; H, 9.68; N, 4.81. IR (KBr disk):  $\nu_{\text{Si-CH}_3}$  832 (s) cm<sup>-1</sup>.

$^1\text{H}$  NMR (400 MHz,  $\text{CDCl}_3$ ): 0.17 (s, 6H,  $(\text{CH}_3)_2\text{Si}$ ), 1.04 (s, 9H,  $(\text{CH}_3)_3\text{C}$ ), 2.00 (s, 3H, 3- $\text{CH}_3$  of  $\text{C}_5\text{N}$ ), 2.03 (s, 3H, 5- $\text{CH}_3$  of  $\text{C}_5\text{N}$ ), 2.35 (s, 3H, 6- $\text{CH}_3$  of  $\text{C}_5\text{N}$ ), 3.91 (s, 3H,  $\text{OCH}_3$ ) ppm.  $^{13}\text{C}\{^1\text{H}\}$  NMR (100 MHz,  $\text{CDCl}_3$ ): -3.1 (s,  $(\text{CH}_3)_2\text{Si}$ ), 10.3 (s, 3- $\text{CH}_3$  of  $\text{C}_5\text{N}$ ), 13.0 (s, 5- $\text{CH}_3$  of  $\text{C}_5\text{N}$ ), 18.8 (s,  $\text{C}(\text{CH}_3)_3$ ), 22.6 (s, 6- $\text{CH}_3$  of  $\text{C}_5\text{N}$ ), 26.1 (s,  $\text{C}(\text{CH}_3)_3$ ), 53.3 (s,  $\text{OCH}_3$ ), 107.5, 116.0, 151.3, 160.0, 161.0 (5s,  $\text{C}_5\text{N}$ ) ppm.

### **Preparation of 2-Methoxy-4-TBSO-3,5-dimethyl-6-chloromethylpyridine (3).**

While a stirred solution of pyridine derivative **2** (2.82 g, 10.0 mmol) in THF (20 mL) was cooled to 0 °C, *n*-BuLi (7.5 mL, 12.0 mmol) was dropwise added and then the mixture continued to be stirred at this temperature for 1 h to give a deep red solution. After the deep solution was slowly added to a solution of hexachloroethane (2.84 g, 12.0 mmol) in THF (10 mL) at -78 °C, the mixture was warmed to 0 °C and then was stirred at this temperature for 2 h. The resulting mixture was washed with 100 mL of saturated aqueous  $\text{NaHCO}_3$  and then extracted with  $\text{Et}_2\text{O}$  (30 mL $\times$ 3). The combined organic layer was dried over anhydrous  $\text{MgSO}_4$ . After removal of  $\text{MgSO}_4$ , the organic layer was evaporated at reduced pressure to give a residue. The residue was subjected to column chromatography (silica gel). Elution with ethyl acetate/hexane (v:v = 3:100) afforded **3** (2.88 g, 91%) as a yellow oil;  $R_f$  = 0.45 [TLC,  $\text{SiO}_2$ , ethyl acetate/petroleum ether (v:v = 3:100)]. Anal. Calcd for  $\text{C}_{15}\text{H}_{26}\text{ClNO}_2\text{Si}$ : C, 57.03; H, 8.30; N, 4.43. Found: C, 57.28; H, 8.17; N, 4.24. IR (KBr disk):  $\nu_{\text{Si-CH}_3}$  830 (vs)  $\text{cm}^{-1}$ .  $^1\text{H}$  NMR (400 MHz,  $\text{CDCl}_3$ ): 0.18 (s, 6H,  $\text{Si}(\text{CH}_3)_2$ ), 1.04 (s, 9H,  $\text{C}(\text{CH}_3)_3$ ), 2.02 (s, 3H, 3- $\text{CH}_3$  of  $\text{C}_5\text{N}$ ), 2.18 (s, 3H, 5- $\text{CH}_3$  of  $\text{C}_5\text{N}$ ), 3.92 (s, 3H,  $\text{OCH}_3$ ), 4.58 (s, 2H,  $\text{CH}_2$ )

ppm.  $^{13}\text{C}\{^1\text{H}\}$  NMR (100 MHz,  $\text{CDCl}_3$ ):  $-3.0$  (s,  $(\text{CH}_3)_2\text{Si}$ ),  $10.5$  (s, 3- $\text{CH}_3$  of  $\text{C}_5\text{N}$ ),  $12.2$  (s, 5- $\text{CH}_3$  of  $\text{C}_5\text{N}$ ),  $18.8$  (s,  $\text{C}(\text{CH}_3)_3$ ),  $26.1$  (s,  $\text{C}(\text{CH}_3)_3$ ),  $46.6$  (s,  $\text{CH}_2$ ),  $53.6$  (s,  $\text{OCH}_3$ ),  $110.8$ ,  $118.1$ ,  $148.8$ ,  $160.5$ ,  $161.4$  (5s,  $\text{C}_5\text{N}$ ) ppm.

**Preparation of (2-MeO-4-TBSO-3,5-Me<sub>2</sub>-6-COCH<sub>2</sub>C<sub>5</sub>N)Fe(CO)<sub>3</sub>I (4).** A mixture of pyridine derivative **3** (0.316 g, 1.0 mmol),  $\text{Na}_2\text{Fe}(\text{CO})_4 \cdot (1,4\text{-dioxane})_{1.5}$  (0.346 g, 1.0 mmol), and NaI (1.50 g, 10 mmol) in MeCN (15 mL) was stirred at room temperature for 4 h. After the resulting mixture was cooled to  $0\text{ }^\circ\text{C}$ ,  $\text{I}_2$  (0.254 g, 1.0 mmol) was added and then the new mixture was stirred at room temperature for 1 h. Volatiles were removed at reduced pressure, the residue was subjected to column chromatography (silica gel). Elution with  $\text{CH}_2\text{Cl}_2$  developed a red band, from which **4** (0.316 g, 55%) was obtained as brown-red solid. Mp  $103\text{--}104\text{ }^\circ\text{C}$  (dec). Anal. Calcd for  $\text{C}_{19}\text{H}_{26}\text{FeINO}_6\text{Si}$ : C, 39.67; H, 4.56; N, 2.43. Found: C, 39.55; H, 4.68; N, 2.62. IR (KBr disk):  $\nu_{\text{C}\equiv\text{O}}$  2081 (vs), 2034 (vs), 2000 (vs);  $\nu_{\text{CH}_2\text{C}=\text{O}}$  1668 (s);  $\nu_{\text{Si-CH}_3}$  830 (s)  $\text{cm}^{-1}$ .  $^1\text{H}$  NMR (400 MHz, acetone- $d_6$ ): 0.31 (s, 6H,  $(\text{CH}_3)_2\text{Si}$ ), 1.09 (s, 9H,  $(\text{CH}_3)_3\text{C}$ ), 2.19 (s, 3H, 3- $\text{CH}_3$  of  $\text{C}_5\text{N}$ ), 2.29 (s, 3H, 5- $\text{CH}_3$  of  $\text{C}_5\text{N}$ ), 4.09 (s, 3H,  $\text{OCH}_3$ ), 4.28 (d,  $J = 20.8\text{ Hz}$ , 1H of  $\text{CH}_2\text{CO}$ ), 4.78 (d,  $J = 20.8\text{ Hz}$ , 1H of  $\text{CH}_2\text{CO}$ ) ppm.  $^{13}\text{C}\{^1\text{H}\}$  NMR (100 MHz, acetone- $d_6$ ):  $-2.9$  (s,  $(\text{CH}_3)_2\text{Si}$ ),  $12.0$  (s, 3- $\text{CH}_3$  of  $\text{C}_5\text{N}$ ),  $14.3$  (s, 5- $\text{CH}_3$  of  $\text{C}_5\text{N}$ ),  $19.2$  (s,  $\text{C}(\text{CH}_3)_3$ ),  $26.1$  (s,  $\text{C}(\text{CH}_3)_3$ ),  $61.3$  (s,  $\text{OCH}_3$ ),  $67.3$  (s,  $\text{CH}_2\text{C}=\text{O}$ ),  $117.4$ ,  $121.4$ ,  $158.0$ ,  $164.7$ ,  $165.7$  (5s,  $\text{C}_5\text{N}$ ),  $200.7$ ,  $210.4$ ,  $211.2$  (3s,  $\text{C}\equiv\text{O}$ ),  $257.4$  (s,  $\text{CH}_2\text{C}=\text{O}$ ) ppm.

## Preparation

of

**(2-MeO-4-TBSO-3,5-Me<sub>2</sub>-6-COCH<sub>2</sub>C<sub>5</sub>N)Fe(CO)<sub>2</sub>( $\eta^2$ -6-Me-2-SC<sub>5</sub>H<sub>3</sub>N) (5).** A mixture of iodide complex **4** (0.120 g, 0.20 mmol), 6-methyl-2-mercaptopyridine (0.275 g, 0.22 mmol), Et<sub>3</sub>N (30.6  $\mu$ L, 0.22 mmol), and CH<sub>2</sub>Cl<sub>2</sub> (10 mL) was stirred at room temperature for 1 h. After volatiles were removed at reduced pressure, the residue was subjected to column chromatography (silica gel). Elution with CH<sub>2</sub>Cl<sub>2</sub>/acetone (v:v = 15:1) developed a yellow band, from which **5** (0.104 g, 91%) was obtained as a yellow solid. Mp 60–61 °C (dec). Anal. Calcd for C<sub>24</sub>H<sub>32</sub>FeN<sub>2</sub>O<sub>5</sub>SiS: C, 52.94; H, 5.92; N, 5.14. Found: C, 52.89; H, 6.05; N, 4.87. IR (KBr disk):  $\nu_{\text{C}\equiv\text{O}}$  2023 (vs), 1956 (vs);  $\nu_{\text{CH}_2\text{C}=\text{O}}$  1646 (s);  $\nu_{\text{Si-CH}_3}$  830 (s) cm<sup>-1</sup>. <sup>1</sup>H NMR (400 MHz, acetone-*d*<sub>6</sub>): 0.29 (s, 6H, (CH<sub>3</sub>)<sub>2</sub>Si), 1.07 (s, 9H, (CH<sub>3</sub>)<sub>3</sub>C), 2.11 (s, 3H, 3-CH<sub>3</sub> of C<sub>5</sub>N), 2.17 (s, 3H, 5-CH<sub>3</sub> of C<sub>5</sub>N), 2.58 (s, 3H, 6-CH<sub>3</sub> of C<sub>5</sub>H<sub>3</sub>N), 3.43 (s, 3H, OCH<sub>3</sub>), 3.71 (d, *J* = 20.0 Hz, 1H of CH<sub>2</sub>CO), 4.24 (d, *J* = 20.0 Hz, 1H of CH<sub>2</sub>CO), 6.51 (d, *J* = 8.0 Hz, 1H, 5-H of C<sub>5</sub>H<sub>3</sub>N), 6.82 (d, *J* = 7.6 Hz, 1H, 3-H of C<sub>5</sub>H<sub>3</sub>N), 7.30 (t, *J* = 7.8 Hz, 1H, 4-H of C<sub>5</sub>H<sub>3</sub>N) ppm. <sup>13</sup>C{<sup>1</sup>H} NMR (100 MHz, acetone-*d*<sub>6</sub>): -4.2 (s, (CH<sub>3</sub>)<sub>2</sub>Si), 10.7 (s, 3-CH<sub>3</sub> of C<sub>5</sub>N), 12.4 (s, 5-CH<sub>3</sub> of C<sub>5</sub>N), 17.9 (s, C(CH<sub>3</sub>)<sub>3</sub>), 21.5 (s, 6-CH<sub>3</sub> of C<sub>5</sub>H<sub>3</sub>N), 24.8 (s, C(CH<sub>3</sub>)<sub>3</sub>), 59.9 (s, OCH<sub>3</sub>), 61.3 (s, CH<sub>2</sub>C=O), 114.9–175.2 (m, C<sub>5</sub>H<sub>3</sub>N, C<sub>5</sub>N), 210.8, 213.5 (2s, C $\equiv$ O), 263.1 (s, CH<sub>2</sub>C=O) ppm.

## Preparation

of

**(2-MeO-4-HO-3,5-Me<sub>2</sub>-6-COCH<sub>2</sub>C<sub>5</sub>N)Fe(CO)<sub>2</sub>( $\eta^2$ -6-Me-2-SC<sub>5</sub>H<sub>3</sub>N) (6).** A mixture of complex **5** (0.280 g, 0.5 mmol), *n*-Bu<sub>4</sub>NF (0.6 mL, 0.6 mmol), acetic acid (34.3  $\mu$ L,

0.6 mmol), and THF (25 mL), was stirred at room temperature for 1 h. After volatiles were removed at reduced pressure, the residue was subjected to column chromatography (silica gel). Elution with CH<sub>2</sub>Cl<sub>2</sub>/acetone (v:v = 5:1) developed a yellow band, from which **6** (0.157 g, 73%) was obtained as a yellow solid. Mp 122–123 °C (dec). Anal. Calcd for C<sub>18</sub>H<sub>18</sub>FeN<sub>2</sub>O<sub>5</sub>S·H<sub>2</sub>O: C, 48.23; H, 4.50; N, 6.25. Found: C, 48.43; H, 4.66; N, 6.05. IR (KBr disk): ν<sub>OH</sub> 3737 (m); ν<sub>C=O</sub> 2026 (vs), 1959 (vs); ν<sub>CH<sub>2</sub>C=O</sub> 1633 (s) cm<sup>-1</sup>. <sup>1</sup>H NMR (400 MHz, acetone-*d*<sub>6</sub>): 2.13 (s, 3H, 3-CH<sub>3</sub> of C<sub>5</sub>N), 2.18 (s, 3H, 5-CH<sub>3</sub> of C<sub>5</sub>N), 2.57 (s, 3H, 6-CH<sub>3</sub> of C<sub>5</sub>H<sub>3</sub>N), 3.42 (s, 3H, OCH<sub>3</sub>), 3.71 (d, *J* = 19.6 Hz, 1H of CH<sub>2</sub>CO), 4.23 (d, *J* = 19.6 Hz, 1H of CH<sub>2</sub>CO), 6.50 (d, *J* = 8.0 Hz, 1H, 5-H of C<sub>5</sub>H<sub>3</sub>N), 6.81 (d, *J* = 7.6 Hz, 1H, 3-H of C<sub>5</sub>H<sub>3</sub>N), 7.29 (t, *J* = 7.6 Hz, 1H, 4-H of C<sub>5</sub>H<sub>3</sub>N), 9.19 (s, 1H, OH) ppm. <sup>13</sup>C{<sup>1</sup>H} NMR (100 MHz, acetone-*d*<sub>6</sub>): 10.4 (s, 3-CH<sub>3</sub> of C<sub>5</sub>N), 12.2 (s, 5-CH<sub>3</sub> of C<sub>5</sub>N), 22.9 (s, 6-CH<sub>3</sub> of C<sub>5</sub>H<sub>3</sub>N), 61.4 (s, OCH<sub>3</sub>), 62.5 (s, CH<sub>2</sub>C=O), 111.4–176.7 (m, C<sub>5</sub>H<sub>3</sub>N, C<sub>5</sub>N), 212.3, 214.9 (2s, C≡O), 264.7 (s, CH<sub>2</sub>C=O) ppm.

## Preparation

of

**(2-MeO-3,5-Me<sub>2</sub>-4-OP=O(OPh)<sub>2</sub>-6-COCH<sub>2</sub>C<sub>5</sub>N)Fe(CO)<sub>2</sub>(η<sup>2</sup>-6-Me-2-SC<sub>5</sub>H<sub>3</sub>N) (7).**

A stirred solution of complex **6** (0.086 g, 0.20 mmol) in CH<sub>2</sub>Cl<sub>2</sub> (10 mL) was cooled to -40 °C, and then Et<sub>3</sub>N (34 μL, 0.24 mmol) and O=P(PhO)<sub>2</sub>Cl (50 μL, 0.24 mmol) were dropwise added. After the resulting mixture was warmed to room temperature, it was continuously stirred at this temperature for 4 h. Volatiles were removed at reduced pressure and the residue was subjected to column chromatography (silica gel).



Elution with CH<sub>2</sub>Cl<sub>2</sub>/acetone (v:v = 20:1) developed a yellow band, from which **7** (0.120 g, 92%) was obtained as an orange solid. Mp 93–94 °C (dec). Anal. Calcd for C<sub>30</sub>H<sub>27</sub>FeN<sub>2</sub>O<sub>8</sub>PS: C, 54.40; H, 4.11; N, 4.23. Found: C, 54.71; H, 4.29; N, 4.16. IR (KBr disk):  $\nu_{\text{C}\equiv\text{O}}$  2018 (vs), 1957 (vs);  $\nu_{\text{CH}_2\text{C}=\text{O}}$  1648 (s);  $\nu_{\text{P}=\text{O}}$  1301 (s) cm<sup>-1</sup>. <sup>1</sup>H NMR (400 MHz, acetone-*d*<sub>6</sub>): 2.21 (s, 3H, 3-CH<sub>3</sub> of C<sub>5</sub>N), 2.28 (s, 3H, 5-CH<sub>3</sub> of C<sub>5</sub>N), 2.58 (s, 3H, 6-CH<sub>3</sub> of C<sub>5</sub>H<sub>3</sub>N), 3.48 (s, 3H, OCH<sub>3</sub>), 3.82 (d, *J* = 20.0 Hz, 1H of CH<sub>2</sub>CO), 4.33 (d, *J* = 20.0 Hz, 1H of CH<sub>2</sub>CO), 6.54 (d, *J* = 8.0 Hz, 1H, 5-H of C<sub>5</sub>H<sub>3</sub>N), 6.83 (d, *J* = 7.6 Hz, 1H, 3-H of C<sub>5</sub>H<sub>3</sub>N), 7.28–7.46 (m, 11H, 4-H of C<sub>5</sub>H<sub>3</sub>N, 2C<sub>6</sub>H<sub>5</sub>) ppm. <sup>13</sup>C{<sup>1</sup>H} NMR (100 MHz, acetone-*d*<sub>6</sub>): 11.6 (s, 3-CH<sub>3</sub> of C<sub>5</sub>N), 13.4 (s, 5-CH<sub>3</sub> of C<sub>5</sub>N), 22.9 (s, 6-CH<sub>3</sub> of C<sub>5</sub>H<sub>3</sub>N), 61.9 (s, OCH<sub>3</sub>), 62.7 (s, CH<sub>2</sub>C=O), 118.0–176.4 (m, C<sub>5</sub>H<sub>3</sub>N, C<sub>5</sub>N, C<sub>6</sub>H<sub>5</sub>), 211.8, 214.7 (2s, C≡O), 263.4 (s, CH<sub>2</sub>C=O) ppm. <sup>31</sup>P {<sup>1</sup>H} NMR (162 MHz, acetone-*d*<sub>6</sub>, 85% H<sub>3</sub>PO<sub>4</sub>): –18.7 (s, P=O) ppm

## 2. X-ray crystal structure determinations of **4** and **7**.

Single crystals of **4** suitable for X-ray diffraction analysis were grown by slow diffusion of hexane into its CH<sub>2</sub>Cl<sub>2</sub> solution at –10 °C, while those of **7** by slow diffusion of hexane into its acetone solution at –20 °C, respectively. A single crystal of **4** was mounted on a SuperNova diffractometer equipped with an AtlasS2 accessory, and data were collected using a confocal monochromator with Cu K $\alpha$  radiation ( $\lambda$  = 1.54184 Å) in the  $\omega$  scanning mode at 100 K. A single crystal of **7** was mounted on a Rigaku MM-007 (rotating anode) diffractometer equipped with a CCD plate, and data were collected using a confocal monochromator with Mo K $\alpha$  radiation ( $\lambda$  = 0.71073 Å) in the  $\omega$ - $\phi$  scanning mode at 113 K. Data collection, reduction, and absorption correction were performed by the CRYSTALCLEAR program<sup>4</sup>, The structures were solved by direct methods using the SHELXS program<sup>5</sup> and refined by Olex2 program<sup>5c</sup> with full-matrix least-squares techniques (SHELXL)<sup>6</sup> on  $F^2$ . Hydrogen atoms were located by using the geometric method. Details of crystal data, data collections, and structure refinements are summarized in Table S1.

**Table S1. Crystal data and structure refinement details for **4** and **7****

|                                          | <b>4</b>                                                        | <b>7</b>                                                                                               |
|------------------------------------------|-----------------------------------------------------------------|--------------------------------------------------------------------------------------------------------|
| mol formula                              | C <sub>19</sub> H <sub>26</sub> FeINO <sub>6</sub> Si           | C <sub>30</sub> H <sub>27</sub> FeN <sub>2</sub> O <sub>8</sub> PS<br>·C <sub>3</sub> H <sub>6</sub> O |
| mol wt                                   | 575.25                                                          | 720.49                                                                                                 |
| cryst syst                               | triclinic                                                       | triclinic                                                                                              |
| space group                              | P-1                                                             | P-1                                                                                                    |
| <i>a</i> /Å                              | 6.7011(2)                                                       | 9.2203(18)                                                                                             |
| <i>b</i> /Å                              | 13.6909(7)                                                      | 9.4569(19)                                                                                             |
| <i>c</i> /Å                              | 13.7031(7)                                                      | 20.857(4)                                                                                              |
| $\alpha$ /deg                            | 104.516(5)                                                      | 85.51(3)                                                                                               |
| $\beta$ /deg                             | 101.534(4)                                                      | 89.66(3)                                                                                               |
| $\gamma$ /deg                            | 92.720(3)                                                       | 67.10(3)                                                                                               |
| <i>V</i> /Å <sup>3</sup>                 | 1186.15(10)                                                     | 1669.6(7)                                                                                              |
| <i>Z</i>                                 | 2                                                               | 2                                                                                                      |
| <i>D<sub>c</sub></i> /g·cm <sup>–3</sup> | 1.611                                                           | 1.433                                                                                                  |
| abs coeff/mm <sup>–1</sup>               | 16.084                                                          | 0.619                                                                                                  |
| <i>F</i> (000)                           | 576.0                                                           | 748.0                                                                                                  |
| index ranges                             | –8 ≤ <i>h</i> ≤ 5<br>–16 ≤ <i>k</i> ≤ 17<br>–15 ≤ <i>l</i> ≤ 17 | –12 ≤ <i>h</i> ≤ 12<br>–12 ≤ <i>k</i> ≤ 12<br>–27 ≤ <i>l</i> ≤ 27                                      |

|                                              |            |            |
|----------------------------------------------|------------|------------|
| no. of reflns                                | 9093       | 20145      |
| no. of indep reflns                          | 4648       | 7919       |
| $2\theta_{\max}$ /deg                        | 148.156    | 55.696     |
| $R$                                          | 0.0416     | 0.0409     |
| $R_w$                                        | 0.1030     | 0.1105     |
| goodness of fit                              | 1.051      | 0.978      |
| largest diff peak,<br>hole/e Å <sup>-3</sup> | 2.99/-1.15 | 0.50/-0.48 |

**3. Comparison of some bond lengths (Å) and angles (deg) between target model 7 and the active site of [Fe]-H<sub>2</sub>ase<sup>7</sup>**

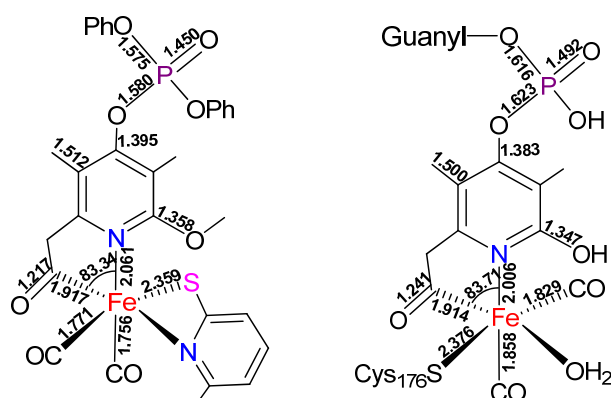

**Scheme S1.** Comparison of some bond lengths (Å) and angles (deg) between target model 7 (left) and the active site of [Fe]-H<sub>2</sub>ase (right)

#### 4. IR and NMR spectra of 1–7 (Figures S1–S22)

##### (1) IR and $^1\text{H}$ ( $^{13}\text{C}$ ) NMR spectra of 1

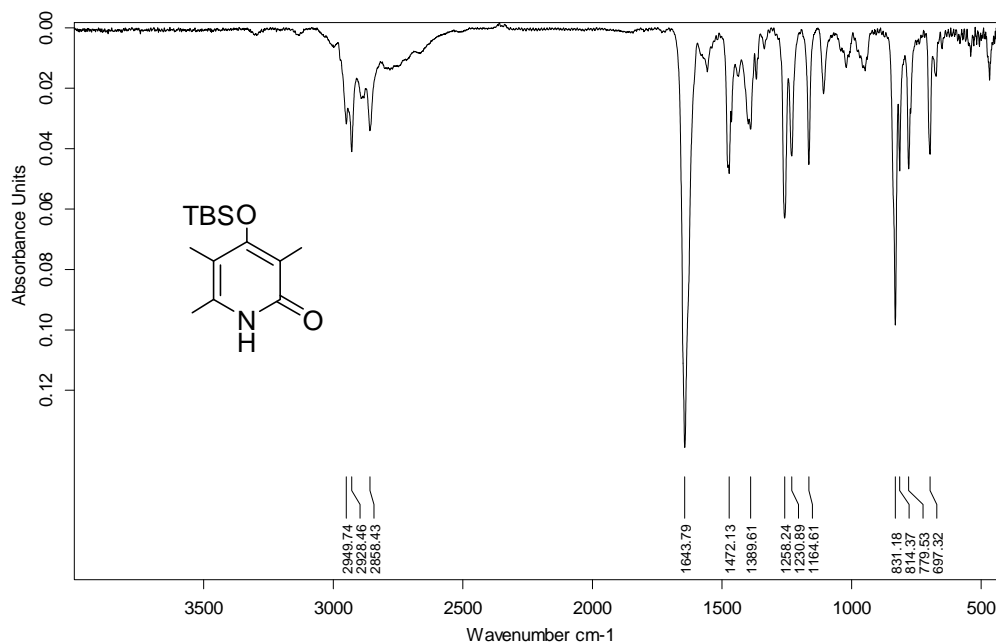

Figure S1. IR spectrum of 1

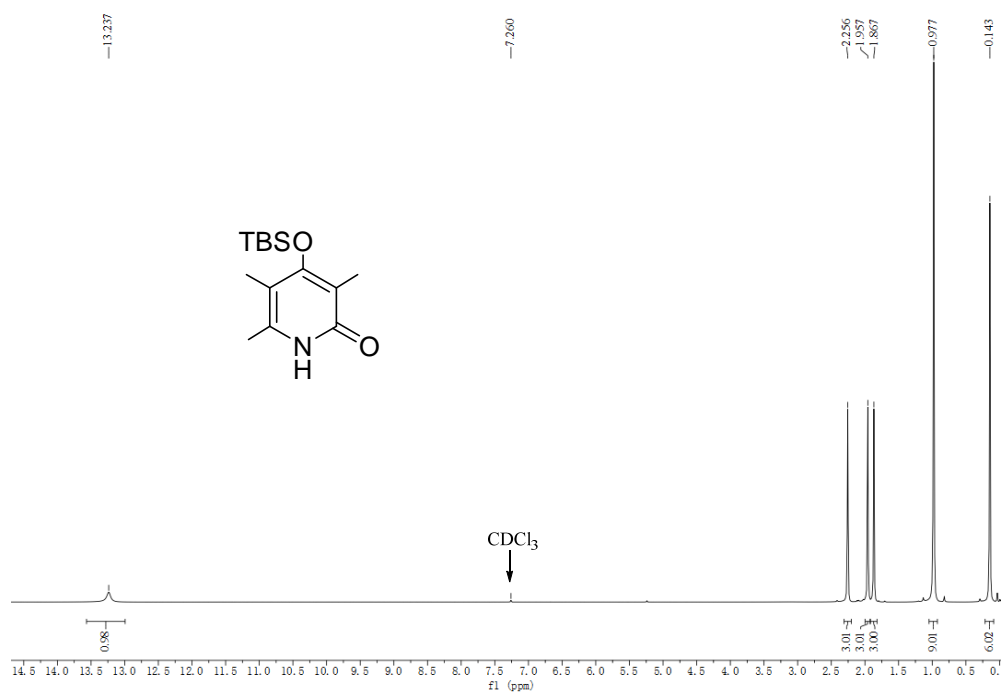

Figure S2.  $^1\text{H}$  NMR spectrum of 1

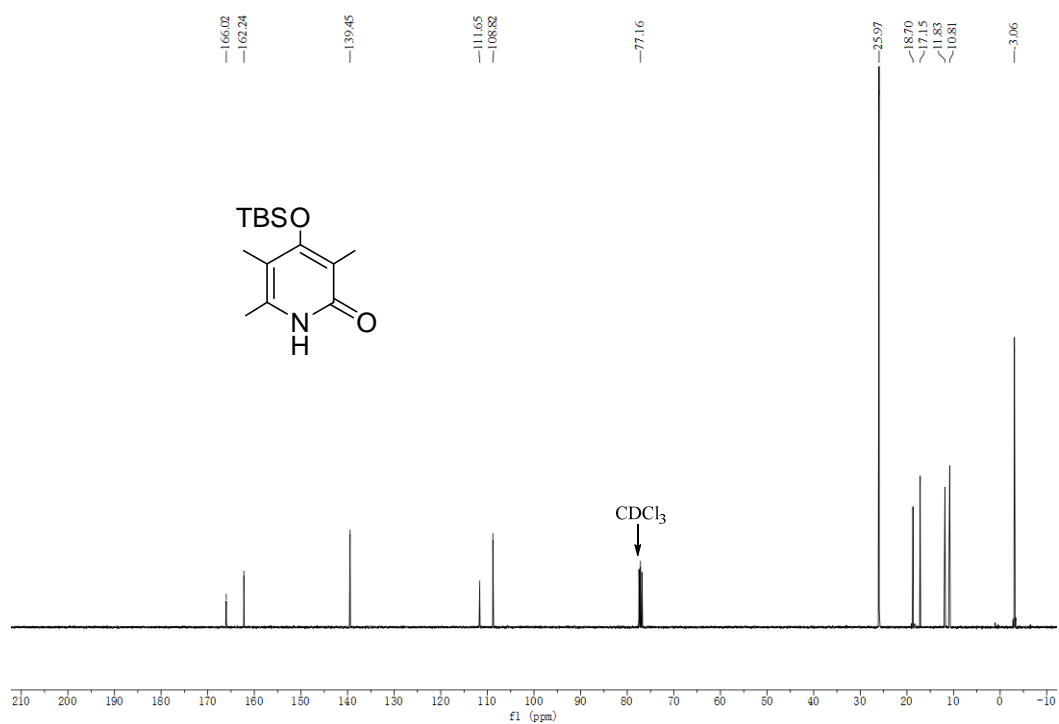

**Figure S3.** <sup>13</sup>C NMR spectrum of **1**

## 2. IR and $^1\text{H}$ ( $^{13}\text{C}$ ) NMR spectra of **2**

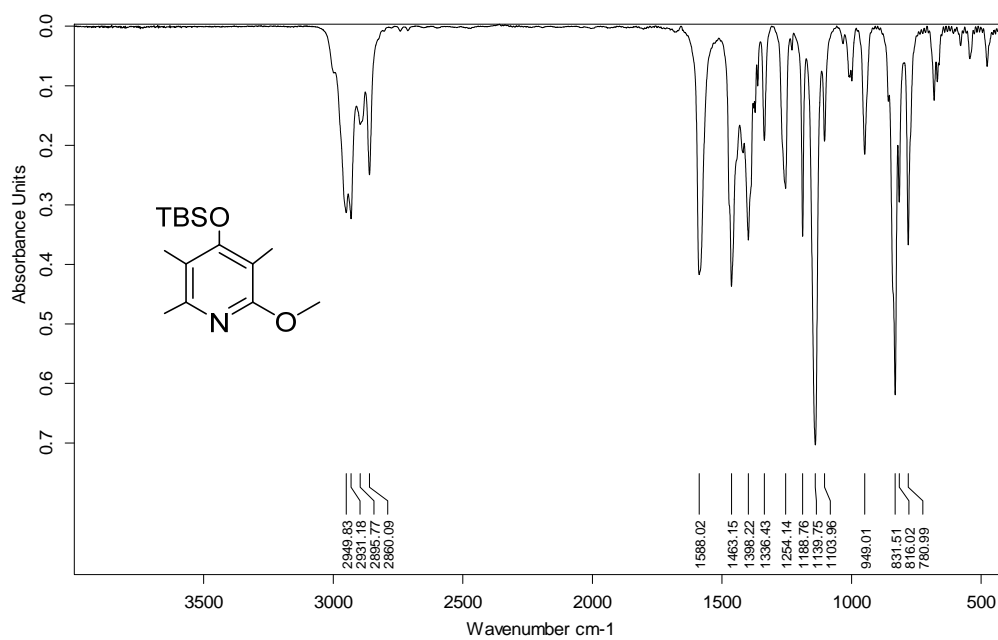

**Figure S4.** IR spectrum of **2**

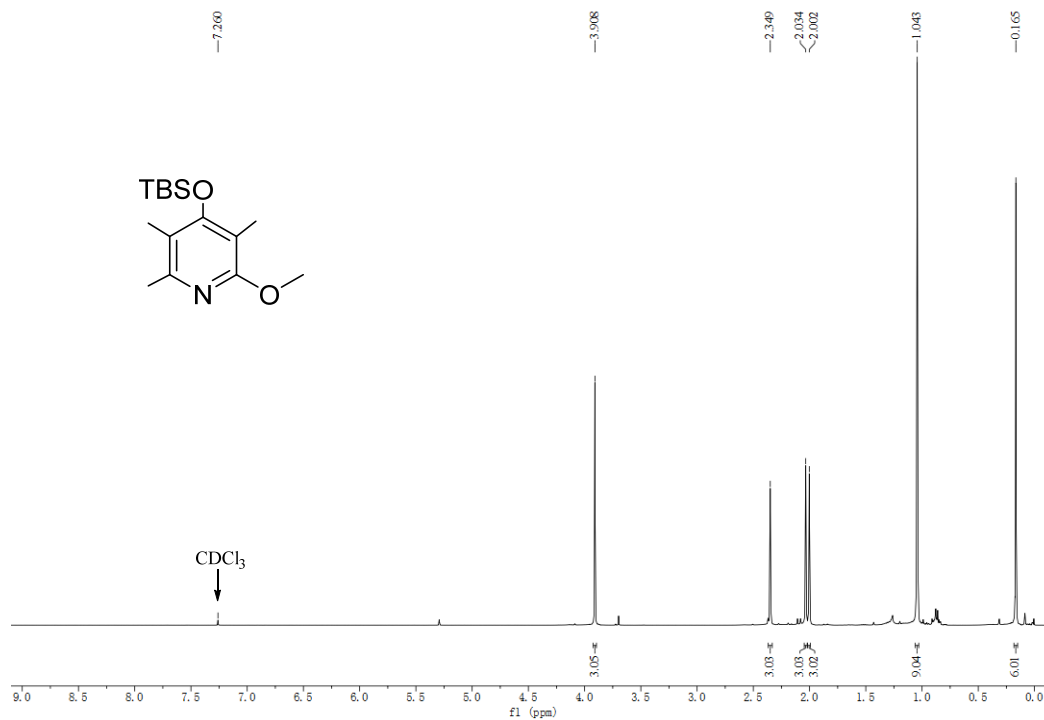

**Figure S5.**  $^1\text{H}$  NMR spectrum of **2**

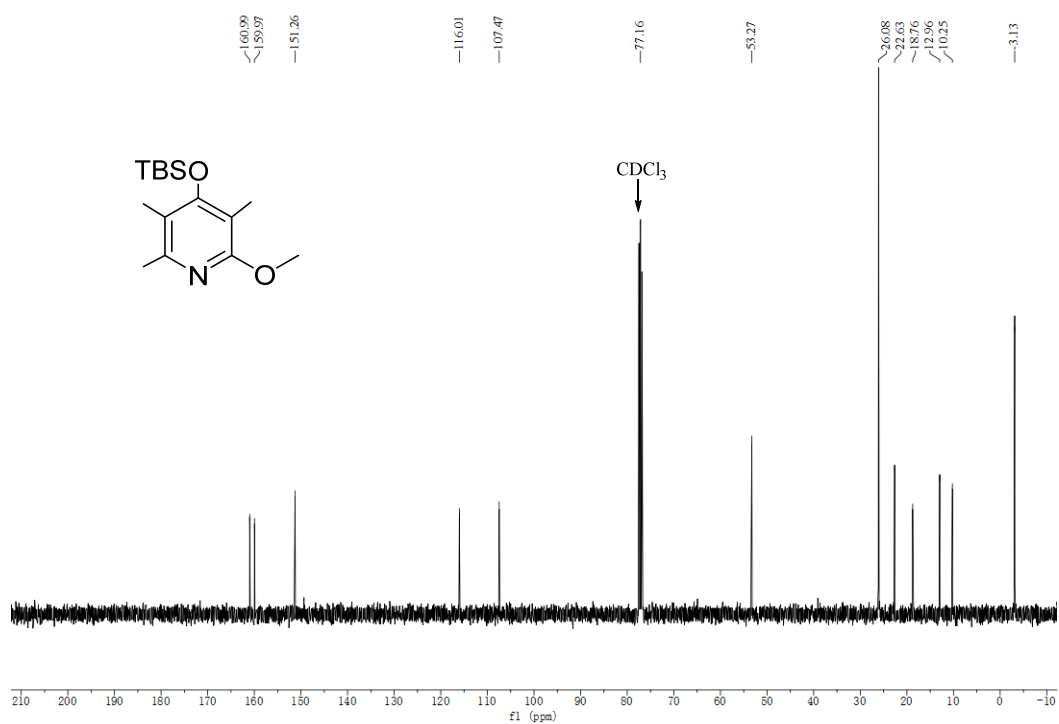

**Figure S6.**  $^{13}\text{C}$  NMR spectrum of **2**



### 3. IR and $^1\text{H}$ ( $^{13}\text{C}$ ) NMR spectra of **3**

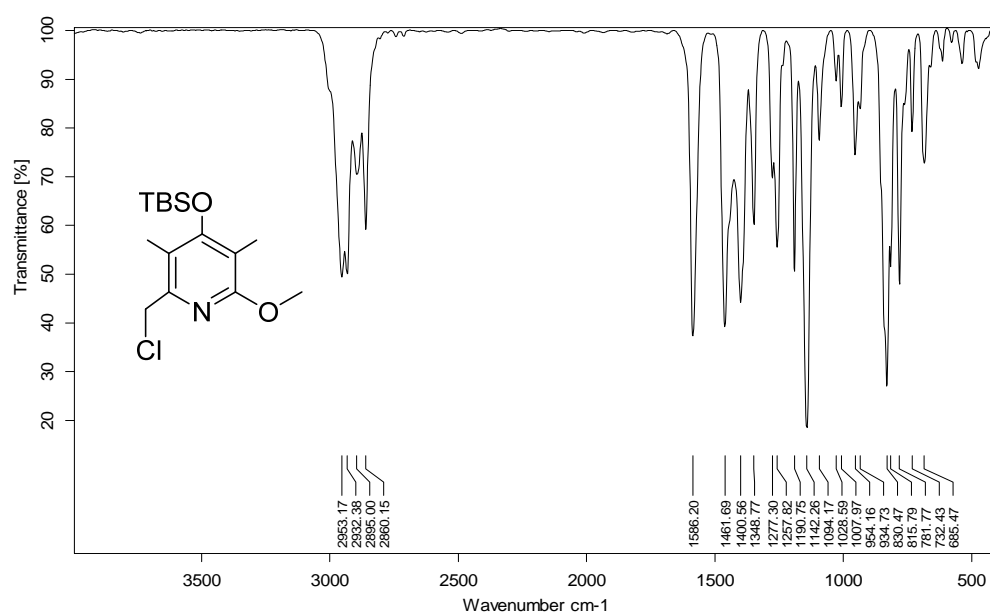

**Figure S7.** IR spectrum of **3**

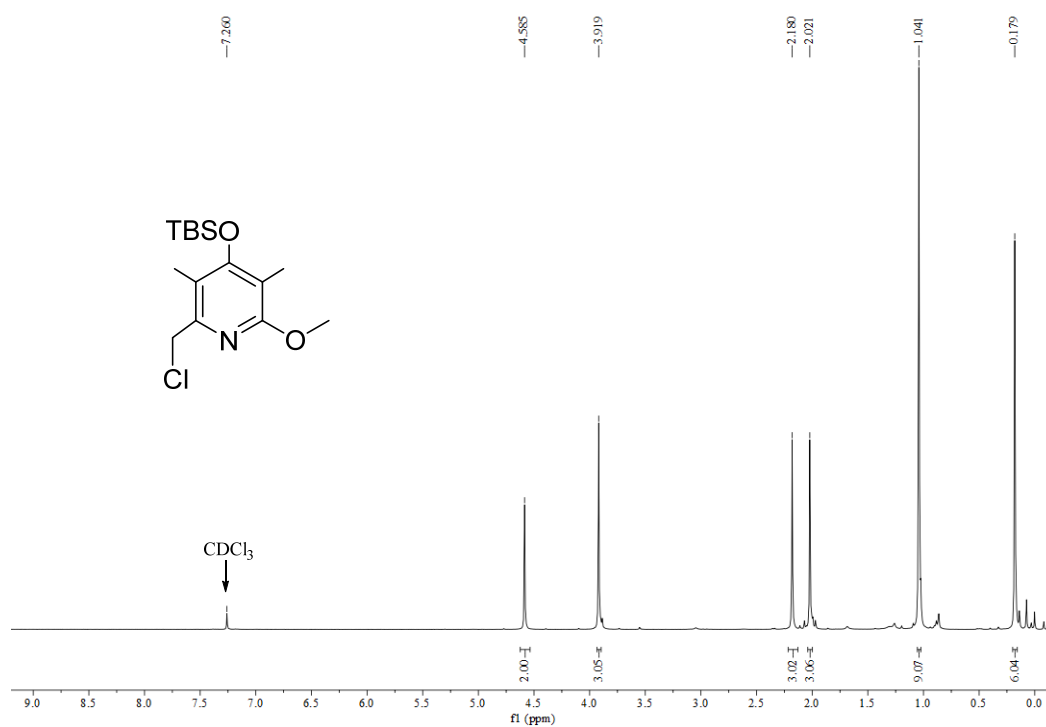

**Figure S8.**  $^1\text{H}$  NMR spectrum of **3**

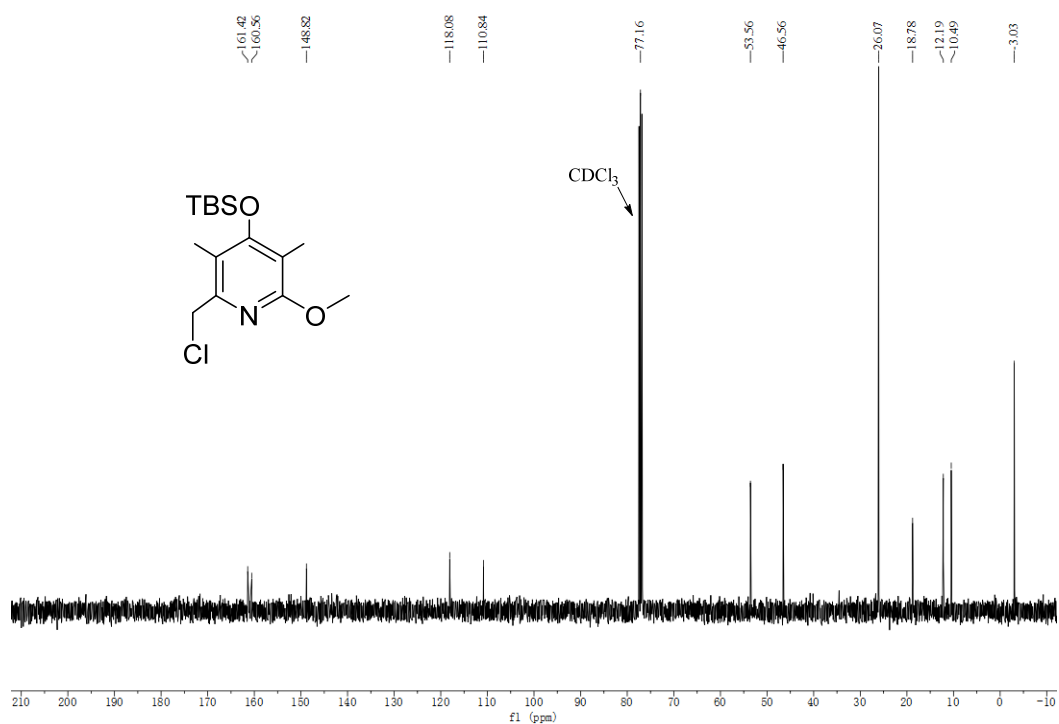

**Figure S9.** <sup>13</sup>C NMR spectrum of **3**

#### 4. IR and $^1\text{H}$ ( $^{13}\text{C}$ ) NMR spectra of **4**

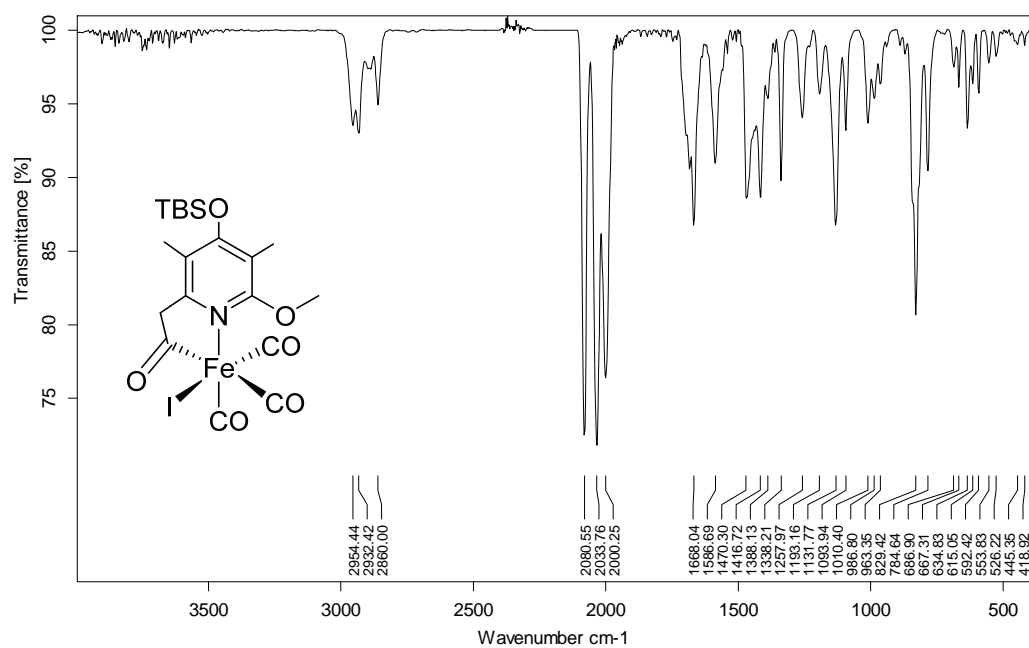

**Figure S10.** IR spectrum of **4**

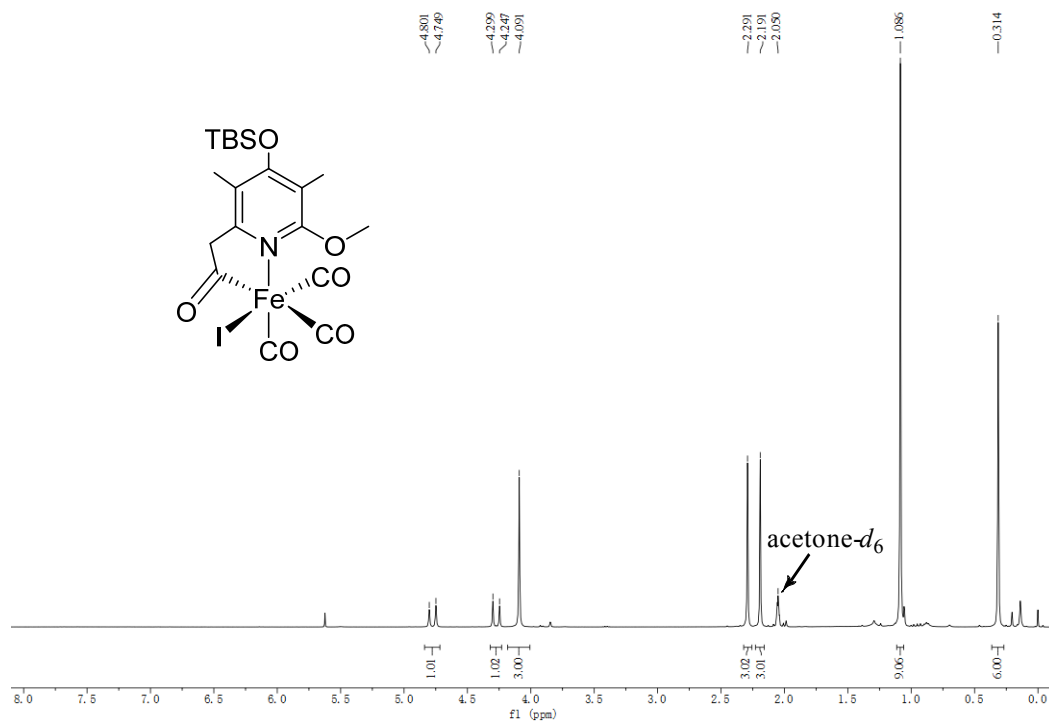

**Figure S11.**  $^1\text{H}$  NMR spectrum of **4**

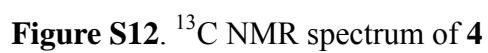

## 5. IR and $^1\text{H}$ ( $^{13}\text{C}$ ) NMR spectra of **5**

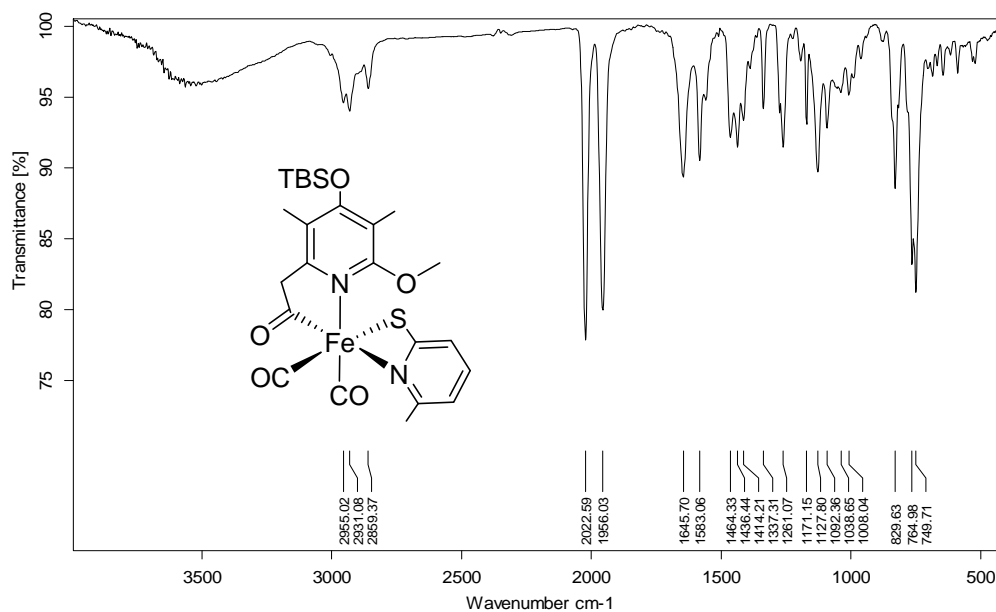

**Figure S13.** IR spectrum of **5**

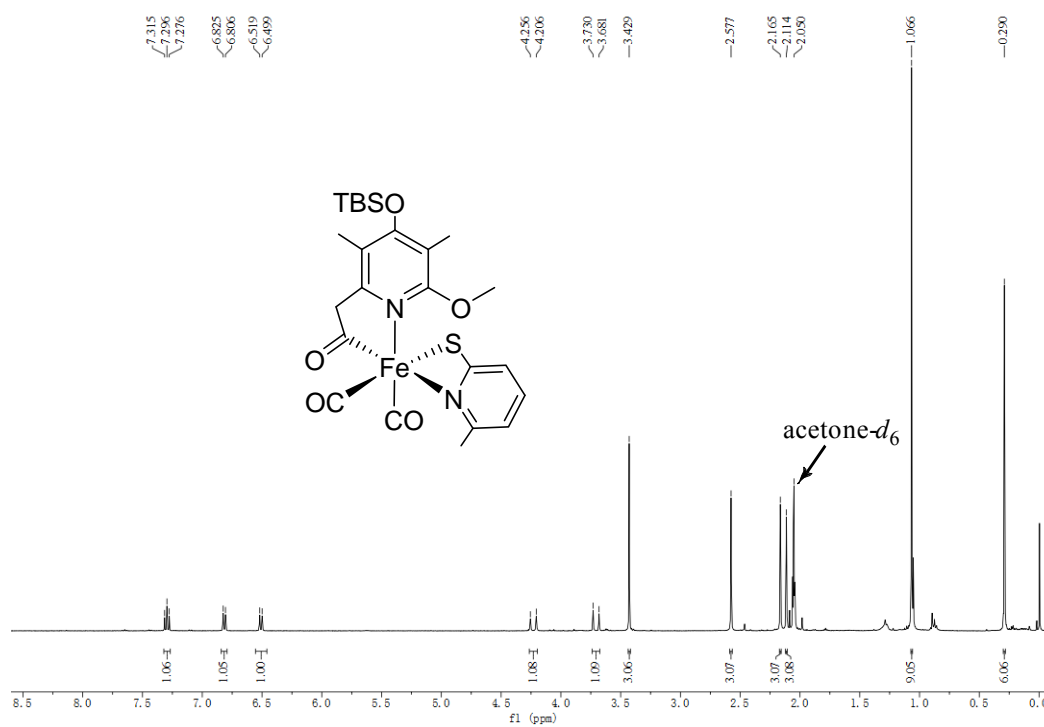

**Figure S14.**  $^1\text{H}$  NMR spectrum of **5**

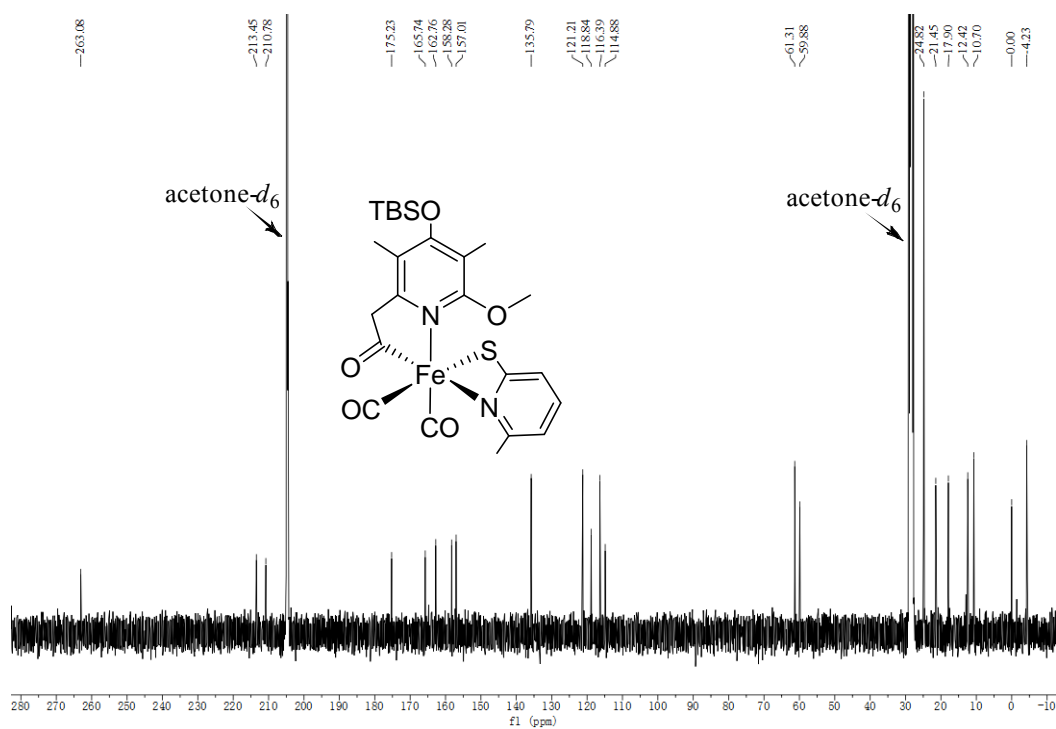

**Figure S15.**  $^{13}\text{C}$  NMR spectrum of **5**

6. IR and  $^1\text{H}$  ( $^{13}\text{C}$ ) NMR spectra of **6**

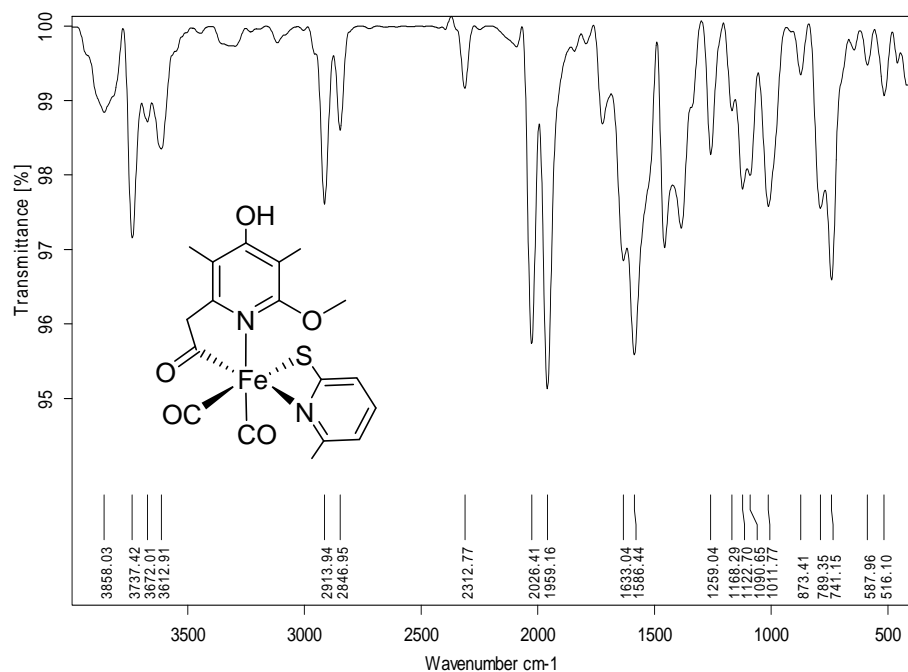

Figure S16. IR spectrum of **6**

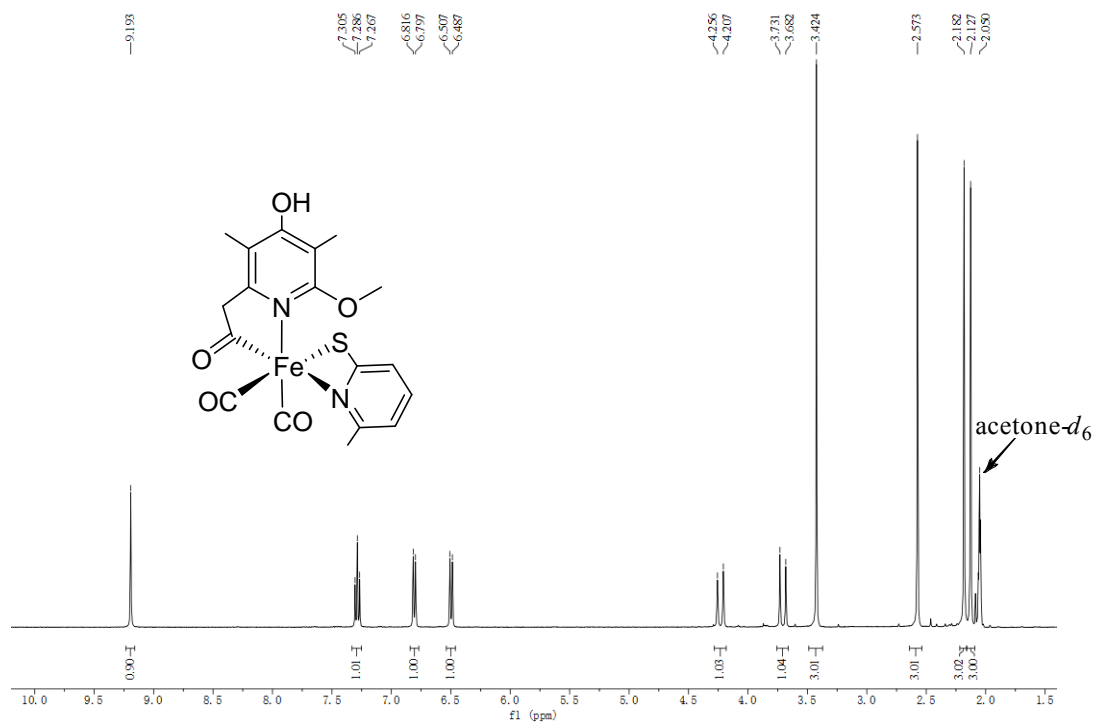

Figure S17.  $^1\text{H}$  NMR spectrum of **6**

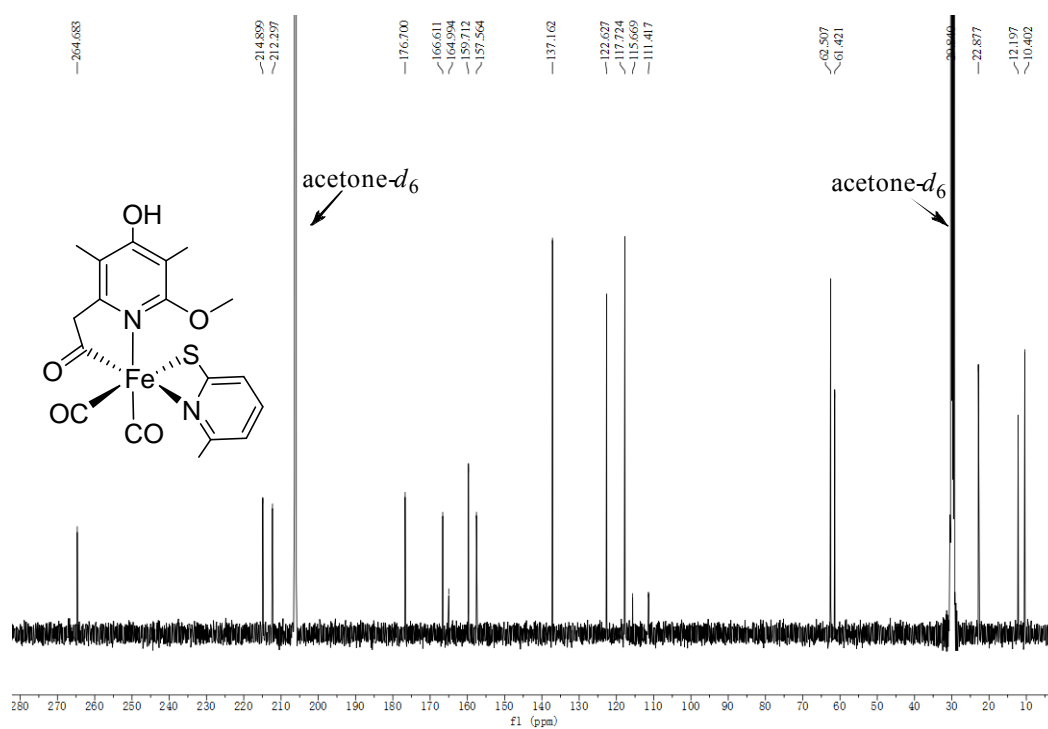

**Figure S18.**  $^{13}\text{C}$  NMR spectrum of **6**



## 7. IR and $^1\text{H}$ ( $^{13}\text{C}$ , $^{31}\text{P}$ ) NMR spectra of 7

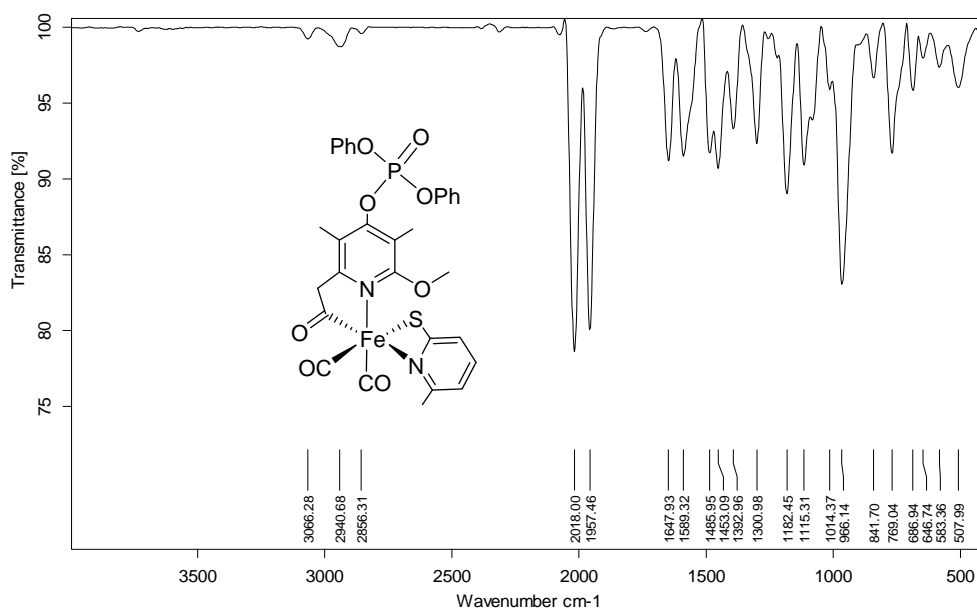

Figure S19. IR spectrum of 7

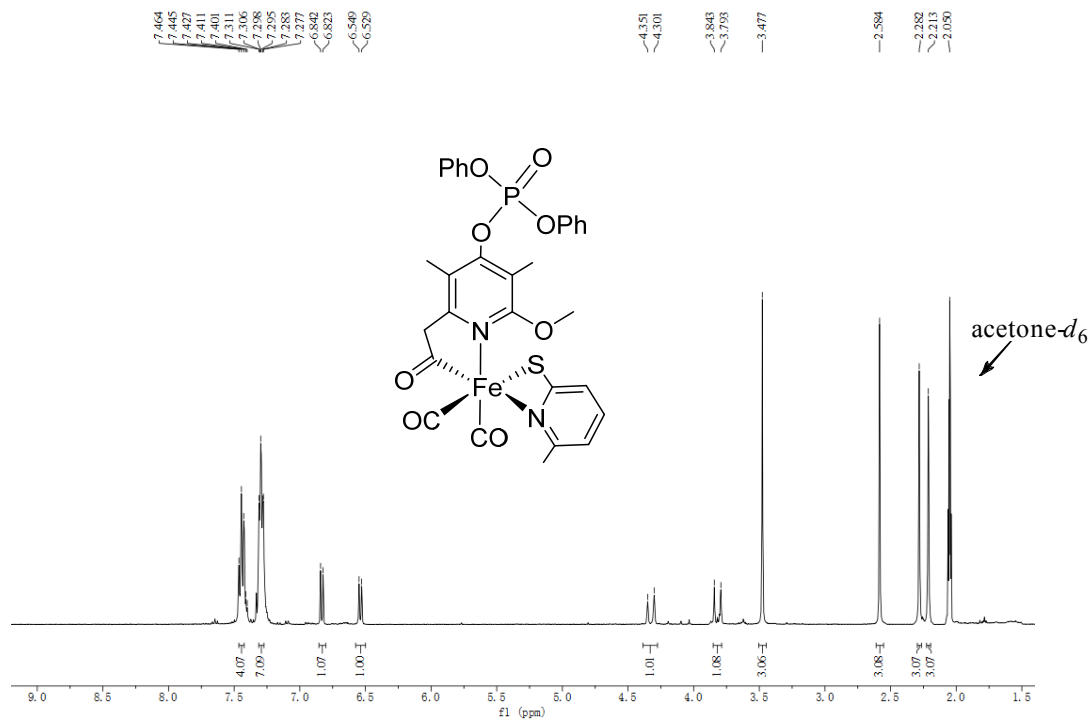

Figure S20.  $^1\text{H}$  NMR spectrum of 7

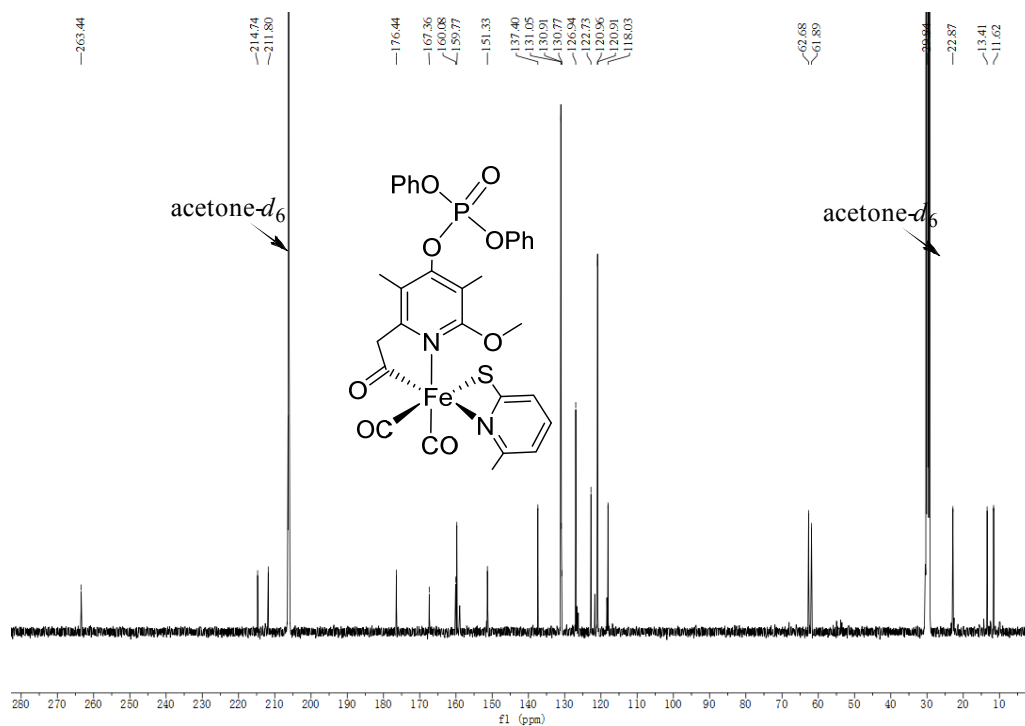

Figure S21. <sup>13</sup>C NMR spectrum of 7

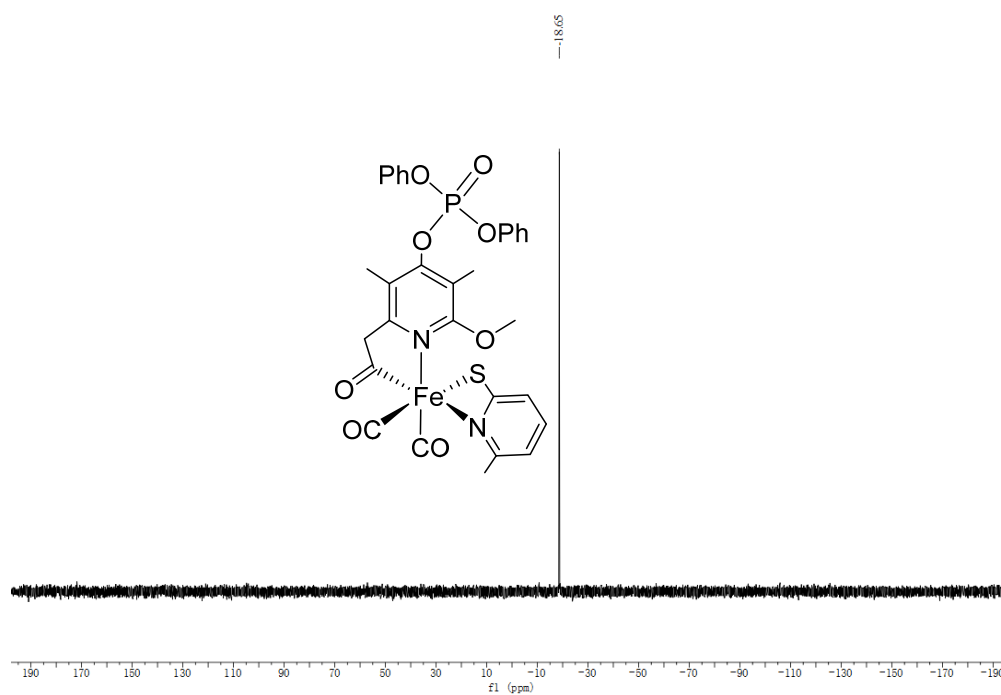

Figure S22. <sup>31</sup>P NMR spectrum of 7

## 5. References

- (1) Mittelbach, M.; Schmidt, H.-W.; Uray, G.; Junek, H.; Lamm, B.; Ankner, K.; Brändström, A.; Simonsson, R. Synthesis of 4-Methoxy-2,3,5-trimethylpyridine: a Specific Building Block for Compounds with Gastric-acid Inhibiting Activity. *Acta Chem. Scand. B* **1988**, *42*, 524-529.
- (2) Kanishchev, O. S.; Dolbier, Jr. W. R. Synthesis and Characterization of 2-Pyridylsulfur Pentafluorides. *Angew. Chem., Int. Ed.* **2015**, *54*, 280-284.
- (3) Wayland, E. N. *Organic Syntheses*; Wiley: New York, **1988**; *Coll. Vol. 6*, pp. 807-814.
- (4) *CrystalClear and CrystalStructure*; Rigaku and Rigaku Americas: The Woodlands, TX, 2007.
- (5) (a) Sheldrick, G. M. *SHELXS-97 and SHELXL-97, Program for Crystal Structure Solution and Refinement*; University of Göttingen: Göttingen, Germany, 1997; (b) Sheldrick, G. M. A short history of *SHELX*. *Acta Crystallogr., Sect. A: Found. Crystallogr.* **2008**, *64*, 112–122; (c) Dolomanov, O. V.; Bourhis, L. J.; Gildea, R. J.; Howard, J. A. K.; Puschmann, H. *OLEX2*: A complete structure solution, refinement and analysis program. *J. Appl. Crystallogr.* **2009**, *42*, 339-341.
- (6) Sheldrick, G. M. *SHELXT*-Integrated space-group and crystalstructure determination. *Acta Crystallogr., Sect. A: Found. Adv.* **2015**, *71*, 3-8.
- (7) Hiromoto, T.; Ataka, K.; Pilak, O.; Vogt, S.; Stagni, M. S.; Meyer-Klaucke, W.; Warkentin, E.; Thauer, R. K.; Shima, S.; Ermler, U. The crystal structure of C176A mutated [Fe]-hydrogenase suggests an acyl-iron ligation in the active site iron complex. *FEBS Lett.* **2009**, *583*, 585-590.
